# Supplementary material for: Characterization of an Alkaline Alginate Lyase with pH-Stable and Thermo-Tolerance Property
Source: MDPI journal article supplement (doi:10.3390/md17050308), 2019-05-24
Supplement: s1 [file s1]

**Supplementary Materials: Cloning and characterization of an alkaline alginate lyase with pH-stable and thermo-tolerance property**

**Yanan Wang, Xuehong Chen, Xiaolin Bi, Yining Ren, Qi Han, Yu Zhou, Yantao Han ,  
Ruyong Yao and Shangyong Li**

Table S1 Primers used in this study

| Primers   | sequences                                           |
|-----------|-----------------------------------------------------|
| PyAly08-F | 5'- GGGAATTC <u>CATATG</u> ATGTTATTGAACAAAATTATT-3' |
| PyAly08-R | 5'- CCG <u>CTCGAG</u> GTAAGAGTAGTTGTCGTGAGT-3'      |

Table S2 Effects of KCl of Aly08. Notes: Activity without addition of chemicals was defined as

100%. Data are shown as means  $\pm$  SD (n = 3).

| Reagent added | Concentration (mM) | Relative activity(%) |
|---------------|--------------------|----------------------|
| None          | -                  | 100.00 $\pm$ 0.24    |
|               | 1                  | 99.67 $\pm$ 0.86     |
| KCl           | 10                 | 100.32 $\pm$ 1.38    |
|               | 50                 | 103.35 $\pm$ 0.75    |
|               | 100                | 103.54 $\pm$ 0.16    |
|               | 200                | 105.87 $\pm$ 0.60    |

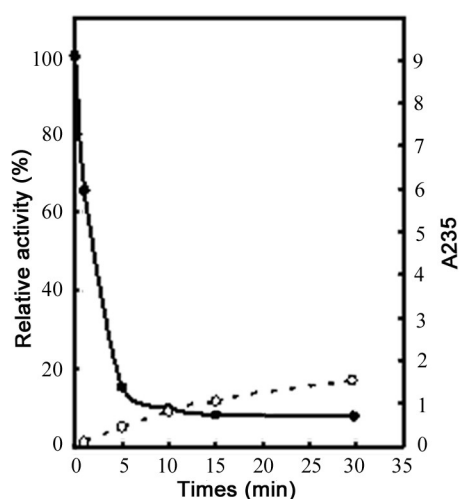

Fig S1 Viscosity measurement of Aly08. The initial viscosity of the reaction mixture without enzyme was taken as 100%. Rate of viscosity reduction is shown as open circles with solid line; the absorbance at 235 nm is shown as filled circles with dotted line
